1 **Estimating the global demand curve for a leishmaniasis vaccine: a generalisable approach based**  
2 **on global burden of disease estimates**

3 Sakshi Mohan<sup>1</sup>, Paul Revill<sup>1</sup>, Stefano Malvolti<sup>2</sup>, Melissa Malhame<sup>2</sup>, Mark Sculpher<sup>1</sup>, Paul M. Kaye<sup>3</sup>

4 1. Center for Health Economics (CHE), University of York, York, United Kingdom

5 2. MMGH Consulting, Zurich, Switzerland

6 3. York Biomedical Research Institute, Hull York Medical School, University of York, York,  
7 United Kingdom

8

9 *Corresponding author: Sakshi Mohan; [sakshi.mohan@york.ac.uk](mailto:sakshi.mohan@york.ac.uk) (ORCID iD: 0000-0002-1268-1769)*

10

11 **Abstract**

12 **Background**

13 A pressing need exists to develop vaccines for neglected diseases, including leishmaniasis. However,  
14 the development of new vaccines is dependent on their value to two key players – vaccine  
15 developers and manufacturers who need to have confidence in the global demand in order to  
16 commit to research and production; and governments (or other international funders) who need to  
17 signal demand based on the potential public health benefits of the vaccine in their local context, as  
18 well as its affordability. A detailed global epidemiological analysis is rarely available before a vaccine  
19 enters a market due to lack of resources as well as insufficient global data necessary for such an  
20 analysis. Our study seeks to bridge this information gap by providing a generalisable approach to  
21 estimating the commercial and public health value of a vaccine in development relying primarily on  
22 publicly available Global Burden of Disease (GBD) data. This simplified approach is easily replicable  
23 and can be used to guide discussions and investments into vaccines and other health technologies  
24 where evidence constraints exist. The approach is demonstrated through the estimation of the  
25 demand curve for a future leishmaniasis vaccine.

**NOTE: This preprint reports new research that has not been certified by peer review and should not be used to guide clinical practice.**

26

## 27 **Methodology/Principal findings**

28 We project the ability to pay over the period 2030-2040 for a vaccine preventing cutaneous and  
29 visceral leishmaniasis (CL / VL), using an illustrative set of countries which account for most of the  
30 global disease burden. First, based on previous work on vaccine demand projections in these  
31 countries and CL / VL GBD-reported incidence rates, we project the potential long-term impact of  
32 the vaccine on disability-adjusted life years (DALYs) averted as a result of reduced incidence. Then,  
33 we apply an economic framework to our estimates to determine vaccine affordability based on the  
34 abilities to pay of governments and global funders, leading to estimates of the demand and market  
35 size. Based on our estimates, the maximum ability-to-pay of a leishmaniasis vaccine (per course,  
36 including delivery costs), given the current estimates of incidence and population at risk, is higher  
37 than \$5 for nearly half of the 24 countries considered, with a median value-based maximum price of  
38 \$4.4-\$5.3, and total demand of over 560 million courses.

39

## 40 **Conclusion/Significance**

41 Our results demonstrate that both the quantity of vaccines estimated to be required by the  
42 countries considered as well as their ability-to-pay could make a vaccine for leishmaniasis  
43 commercially attractive to potential manufacturers. The methodology used can be equally applied to  
44 other technology developments targeting health in developing countries.

45

## 46 **Author summary**

47 As of 2019, between 498,000 and 862,000 new cases of all forms of leishmaniasis were estimated to  
48 occur each year resulting in up to 18,700 deaths and up to 1.6 million DALYs lost. Given low  
49 treatment coverage, poor compliance and the emergence of drug resistance, challenges in  
50 sustaining vector control strategies and the ability of parasites to persist in animal reservoirs

51 independent of human infection, an effective vaccine could significantly reduce the health and  
52 economic burden of these diseases. However, commitment to the development of a new vaccine  
53 requires a market signal from governments and global funders who in turn require better estimates  
54 of the potential public health value of the vaccine. This study uses the development of a  
55 leishmaniasis vaccine as a case study to illustrate a generalizable approach to estimating the  
56 commercial and public health value of a technology relying primarily on publicly available GBD data.  
57 More specifically, by projecting the potential public health impact of the rollout of a leishmaniasis  
58 vaccine and translating this into monetary values based on the concept of health opportunity cost,  
59 we estimate the demand curve for such a vaccine for an 11-year period between 2030 and 2040. At  
60 an estimated global demand of over 560 million courses and a median value-based maximum price  
61 of \$4.4-\$5.3, our results demonstrate that both the quantity of vaccines estimated to be required by  
62 the countries considered as well as their ability-to-pay make the vaccine commercially attractive to  
63 potential manufacturers.

64

## 65 **Introduction**

66 According to the Global Burden of Disease (GBD) study 2019, between 498,000 and 862,000 new  
67 cases of all forms of leishmaniasis were estimated to occur each year resulting in up to 18,700  
68 deaths and up to 1.6 million DALYs lost(1). Previously designated one of the most neglected among  
69 neglected tropical diseases (NTDs) based on limited resources invested in diagnosis, treatment and  
70 control(2), leishmaniasis accounts for 4% of the global DALY burden of NTDs and 5.5% of global NTD-  
71 related deaths. Furthermore, it is widely believed that these numbers grossly underestimate the real  
72 burden of leishmaniasis as a result of underreporting and limited understanding of the true lifetime  
73 impact of the disease(3–5).

74

75 The two most prevalent forms of leishmaniasis are localized cutaneous leishmaniasis (CL) and  
76 visceral leishmaniasis (VL). Despite the availability of effective treatment regimens, access to

77 treatment remains low(6,7). Given low treatment coverage, the occurrence of poor compliance and  
78 the emergence of drug resistance(8), challenges in sustaining vector control strategies(9), and the  
79 ability of parasites to persist in animal reservoirs, vaccines are widely regarded as having the  
80 potential to significantly impact the health burden posed by leishmaniasis and to contribute to  
81 regional leishmaniasis elimination campaigns (10). Between 2007 and 2013, nearly \$66 million was  
82 invested by public sector and philanthropic funders towards leishmaniasis vaccine research and  
83 development(11). Numerous vaccine candidates have been evaluated in preclinical models of  
84 disease, but few have progressed to clinical trial stage(11). Currently, only one therapeutic clinical  
85 trial is ongoing (12), and a genetically attenuated live *L. major* vaccine is due to be manufactured for  
86 use in a clinical trial in 2021(13,14).

87

88 However, it is not enough just to develop a clinically effective vaccine. Rather, the vaccine also needs  
89 to be affordable and suitable for delivery and administration in health systems. In particular, for a  
90 vaccine to be produced and used, it needs to offer value to two key players: vaccine developers and  
91 manufacturers who need to have confidence in global demand in order to commit to research and  
92 production; and governments (or other international funders) who need to be sure of the potential  
93 public health benefits of the vaccine in their local context, as well as affordability of the vaccine, in  
94 order to signal demand.

95

96 This study seeks to fill this information gap about the commercial value proposition and likely  
97 demand for a future leishmaniasis vaccine. This evaluation of a vaccine's potential economic value  
98 can also help shed light on key targets for vaccine development and manufacturing plans such as  
99 efficacy targets, target population groups/geographies, upper bound for manufacturing costs (and  
100 required scale of manufacturing), and target market size while the vaccine is under development.

101

102 More generally, this study seeks to develop a simplified and generalizable framework which employs  
103 publicly available burden of disease data to project the affordability, market size and public health  
104 value of new interventions in order to inform and spur continued product development that can  
105 improve health in low and middle-income countries (LMICs).

106

## 107 **Methods**

### 108 **General approach**

109 This study assesses the value associated with the introduction of a vaccine to prevent CL / VL. Value  
110 is assessed in terms of the vaccine's potential impact on mortality and morbidity taking into account  
111 its affordability within an illustrative set of countries in which the disease is endemic. First, based on  
112 previous work on vaccine demand projections in these countries(14) and CL / VL incidence rates(1),  
113 we project the potential long-term impact of a leishmaniasis vaccine on disability-adjusted life years  
114 (DALYs) averted as a result of reduced incidence. Ideally, such an analysis would require a detailed  
115 modeling of the disease epidemiology, disease dynamics, and health system capabilities of each  
116 country under consideration. However, such models are not currently available for most countries  
117 but planning for vaccine research and manufacturing needs to continue in their absence. Therefore,  
118 we sought to develop a simplified approach, which uses publicly available data on disease incidence  
119 and burden and population growth projections to assess the public health value of a future vaccine.

120

121 Second, we apply a health economic framework to our estimates of the future health impact of a  
122 vaccine to determine the vaccine's affordability based upon the abilities to pay of governments and  
123 global funders, leading to estimates of the demand and market size in this illustrative set of  
124 countries. All monetary values are presented in 2019 US Dollars (USD).

125

### 126 **Geographic focus**

127 The analysis in this paper is focused on a representative sample of 24 countries belonging to a range  
128 of income levels(15), geographic regions, type of endemic leishmaniasis, and Gavi, The Vaccine  
129 Alliance (GAVI) support status(16) (**Table 1**). In 2019, these countries together represented 80% of  
130 the global DALY burden of CL and VL, and 70% and 82% of the global incidence of CL and VL  
131 respectively (1).

132

### 133 **Vaccine efficacy and health effects**

134 In the absence of a rigorous epidemiological model, we project the health effect of a vaccine using  
135 the following estimates: i) total population susceptible to the disease (or population at risk); ii)  
136 incidence of the disease among the population at risk; iii) per person burden of disease; and iv)  
137 vaccine coverage and efficacy. This sub-section describes how these estimates were obtained and  
138 used.

139

140 Environmental factors that affect the relationship between hosts, vectors (human, animal or sandfly)  
141 and the reservoir determine the risk of leishmaniasis in the population. Malvolti et al. (2021)(14)  
142 draw upon WHO Leishmaniasis country profiles as well as Pigott et al. (2014) (17) to project the size  
143 of the population at risk for leishmaniasis-endemic countries until 2040 using 5-year population  
144 growth projections from UN/DESA(18). The age-wise composition of the population at risk was  
145 based on projection from the World Population Prospects report(19).

146

147 Incidence estimates were obtained from the Global Burden of Disease (GBD) study in 2019(1). These  
148 were converted into incidence rates specific to populations at risk for 2019 by dividing the incidence  
149 by the size of the population at risk (note that this assumes that no one outside the main population  
150 at risk contracts the disease) for the different age groups included in the vaccine demand projections  
151 in Malvolti et al. (2021)(14), namely 0-4 years, 5-14 years, and 15-29 years old. In the absence of  
152 epidemiological projections of leishmaniasis incidence and given that there has not been a

153 significant decline in incidence over the last five years(20), we make the assumption that the  
154 incidence rate among the population at risk remains constant between 2019 and 2040. Note that for  
155 countries with anthroponotic VL transmission (i.e. Bangladesh, India, Nepal, Somalia, South Sudan  
156 and Sudan), where VL is projected to be eliminated by Malvoti et al. (2021) (14) through existing  
157 measures and deployment of a vaccine, we assume that in the absence of vaccine introduction, the  
158 population at risk would continue to grow at the 5-year population growth rate from UN/DESA(18).

159  
160 Similarly, the per person DALY burden of the disease was obtained from the 2019 GBD study for  
161 each country and age group considered by dividing the relevant total DALY burden by the incidence,  
162 given that the average duration of both CL and VL is less than a year(21). The 2019 values of the  
163 epidemiological parameters used are shown in **Table 2**. This approach was taken due to the lack of  
164 country-level data on the per-case DALY burden of the disease. We considered it important to use  
165 country-level estimates due to the disparity between countries(2) in terms of clinical and  
166 epidemiological presentations, comorbidities, treatment coverage, and fatality rates.

167  
168 Based on previously developed vaccines(22), efficacy was assumed to be 75% in the base case  
169 (based on the efficacy of previously researched leishmanization methods(22,23)). However, an  
170 efficacy range between 50% and 95% is considered under sensitivity analysis. The duration of the  
171 efficacy was assumed to be 10 years and an annual discount rate of three percent applied to health  
172 gains in the future.

173

#### 174 **Quantity of vaccines demanded**

175 Quantity demanded or demand here refers to the total vaccines projected to be required by a  
176 country in a given year based on the target population at risk and rollout constraints, regardless of  
177 market price. The vaccine demand projections are based on Malvoti et al. (2021)(14). This assumed  
178 a dual vaccine delivery strategy, including a catch-up campaign at the start followed by rollout in a

179 routine immunization program. Routine immunization includes two age groups - 0-4 years, and 5-14  
180 years. The catch-up campaign for CL includes two groups - 5-14 years, and 15-29 years; and for VL  
181 only the 5-14 years age group was assumed to be targeted. Coverage estimates (those vaccinated as  
182 a percentage of those targeted) are based on current vaccines with similar vaccination rollout  
183 strategies (see Malvoti et al (2021)(14) for details) . Country-wise vaccine demand projections by  
184 age are provided in **Supplementary table 1**.

185

### 186 **Health economic analysis – global demand for a leishmaniasis vaccine**

187 We assume that a health intervention should be provided if it produces more health than could be  
188 generated elsewhere in the health care system with the same resources (i.e. the benefits exceed the  
189 opportunity costs). For every DALY averted (or QALY gained) from a new intervention, a health  
190 system should pay no more than the cost at the margin at which it is already able to avert a DALY  
191 from existing interventions (i.e. the marginal productivity; sometimes estimated as a cost-  
192 effectiveness threshold (CET)). This approach, previously applied in country-specific studies(24,25),  
193 allows us to estimate the maximum ability-to-pay, or the value-based maximum price, for a  
194 leishmaniasis vaccine with a given efficacy. A country would demand the required number of  
195 courses of the vaccine(14) if the price offered by the manufacturer is below their value-based  
196 maximum price, and none if the global market price is above their value-based maximum price. Note  
197 that our ability to pay estimates are inclusive of implementation costs incurred for the rollout of the  
198 vaccine, i.e. the ability to pay for the medical product itself can be calculated by countries by  
199 subtracting their local implementation costs from our estimates.

200

201 To determine a price at which a country can afford the hypothetical vaccine requires an estimate of  
202 the CET to reflect marginal productivity. We use the ‘health budget opportunity cost’ approach(26)  
203 for CET estimates. A country government may choose to fund the vaccine only if it generates more  
204 health than that which would be forgone if its limited health budget is redirected from existing



205 interventions to the vaccine. Country-level CETs have previously been estimated until 2040 by Lomas  
206 et al. (2021)(27) based on historical estimates (28) of the marginal productivity of the different  
207 countries' health systems. For countries for which these estimates were missing, CETs were  
208 projected as an appropriate percentage of the projected GDP per capita(29) based on Ochalek et al.  
209 (2020)(30). Country-level CET estimates used here are provided in **Supplementary table 2**.

210

211 In addition to averting DALYs through reduced infections, the vaccine would also reduce system  
212 treatment costs which in turn would indirectly increase the ability to pay for the vaccine. The actual  
213 reduction in treatment costs for the infected population depends on the expected coverage of  
214 treatment, which in most countries would be less than 100%. In the absence of data on  
215 leishmaniasis treatment coverage, we project the value-based maximum price under the  
216 assumptions of both 0% and 100% treatment coverage to represent its upper and lower bounds.

217

218 We assume an average treatment cost per VL case of \$541 based on Carvalho et al. (2017) (31). This  
219 estimate includes the average cost through the lifecycle of treatment including pre-diagnosis  
220 consultation, drug therapy, hospitalization and ambulatory care until post-treatment consultations.  
221 Note that the drug therapy costs are based on the proportion of VL cases treated with meglumine  
222 antimoniate, liposomal amphotericin B or amphotericin B deoxycholate respectively in Brazil in  
223 2014. The average treatment cost per CL case is assumed to be \$57.6 based on Rodriguez et al.  
224 (2019)(32). This estimate is based on the cost of the drug used (Intralesional pentavalent antimonials  
225 (ILPA)) and staff time costs for CL treatment in Bolivia.

226

227 Using these concepts, we were able to calculate the value-based maximum price for a course of the  
228 leishmaniasis vaccine that each country is able to pay during each year of rollout, given the potential  
229 health benefit provided by the vaccine, and the country's CET (Box 1, equation 1). The demand for  
230 vaccines for both CL and VL prevention and the ability-to-pay for each target use case (CL prevention

231 and VL prevention) are aggregated to derive each country's global ability-to-pay for the vaccine (Box  
232 1, equation 3).

233

234 Combined with the vaccine courses estimated to be required for each country, these are used to

235 construct global demand curves for the vaccine during the 11-year period between 2030 and 2040.

236 For this purpose, we estimate the average value-based maximum price over 11 years, by dividing the

237 sum of the maximum resources which could be committed towards the leishmaniasis vaccine during

238 each year (price times demand) by the aggregate demand between 2030 and 2040.

239

**Box 1: Equations to estimate countries abilities to pay for a leishmaniasis vaccine**

The value-based maximum price or ability-to-pay for a course of a leishmaniasis vaccine that each country is able to pay is estimated using the following formula:

$$p_{i,t,\alpha} = \frac{CET_{i,t} \Delta DALY_{i,t,\alpha} + \Delta T_{i,t,\alpha}}{q_{i,t,\alpha}}, \quad (1)$$

$$\Delta DALY_{i,t,\alpha} = \sum_{\beta} \left[ \Delta I_{i,t,\alpha,\beta} \sum_{n=0}^N \frac{\Delta DALY_{pp_{i,\alpha,\beta}}}{(1+r)^n} \right]$$

$$\Delta T_{i,t,\alpha} = \theta \sum_{n=0}^N \frac{\Delta I_{i,t,\alpha} T_{pp_{\alpha}}}{(1+r)^n}$$

$$\alpha = \{CL, VL\}$$

Where  $i$  = country

$t$  = year of vaccination

$\beta$  = age groups-- 0-4 years, 5-14 years, 15-29 years

$n$  = year of vaccine efficacy

$N$  = Number of years for which the vaccine is effective

$r$  = annual discount rate

$p$  = Value-based price for a course of the vaccine

$CET$  = Cost-effectiveness threshold (\$/DALY averted)

$\Delta DALY$  = Total DALYs averted from the reduction in CL-related/VL-related mortality

$\Delta DALY_{pp}$  = Change in DALYs per person infected with CL/VL

$I$  = Change in CL/VL incidence as a result of the administration of the vaccine

$T$  = Direct treatment cost of CL/VL

$T_{pp}$  = Direct treatment cost per case of CL/VL

$q$  = demand for the vaccine

$\theta$  = coverage of leishmaniasis (CL and VL) treatment

To obtain the aggregate demand curve for the period 2030-2040, we obtain the aggregate demand for vaccine courses and the average value-based maximum price for each country across the target use cases as follows:

$$Q_i = \sum_{\alpha} \sum_t q_{i,t,\alpha} \quad (2)$$

$$\bar{p}_i = \frac{\sum_{\alpha} \sum_t p_{i,t,\alpha} q_{i,t,\alpha}}{Q_i} \quad (3)$$

Where

$Q_i$  = country  $i$ 's aggregate demand for the vaccine between 2030 and 2040

$\bar{p}_i$  = Average value-based price for a course of the vaccine for country  $i$  for the period under consideration

240

241 **Sensitivity Analysis**

242 We evaluate the sensitivity of the projected global demand curves to three factors - i) vaccine  
243 efficacy, ii) contributions from GAVI, and iii) adjustment for underreporting of leishmaniasis  
244 incidence.

245

246 Under the first sensitivity analysis, the value-based maximum prices and global demand curves are  
247 reevaluated for vaccine efficacy rates of 50% and 95%.

248

249 Sensitivity analysis is also carried out to assess the effect on global demand curves with GAVI  
250 contribution towards countries which are expected to be eligible for support between 2030 and  
251 2040 based on GDP per capita projections(29) using GAVI's criterion for support as of 2019(16). We  
252 assume that a country is eligible for GAVI support during the 11 years under consideration if its  
253 projected GDP per capita between 2026 and 2028 is under \$1580 (i.e. the country is either in the  
254 initial self-financing or preparatory transition phase) or if its GDP per capita has been greater than  
255 \$1580 for 5 years or less between 2022 and 2028 (i.e. the country is in the accelerated transition  
256 phase). Given GAVI's current portfolio of vaccines, we expect GAVI's maximum ability to pay for  
257 vaccines to be higher than that of some of the countries eligible for support. Based on previous work  
258 on GAVI's willingness to pay for the rotavirus vaccine(33), we assume GAVI's cost effectiveness  
259 threshold to be \$285 in 2019 USD. Therefore, under this sensitivity analysis, we re-estimate the  
260 demand curve for a leishmaniasis vaccine by increasing the CET value for countries eligible for GAVI  
261 support to \$285 if their own CET is lower in a given year. Country-level GAVI support projections are  
262 provided in **Supplementary table 3**.

263

264 Finally, we also assess the potential effect of adjusting for the underreporting of cases on the value-  
265 based maximum price, using estimates from Alvar et al. (2012)(34) of CL and VL underreporting by  
266 factors in the ranges 3.2-5.7 and 3.5-6.7 respectively (globally).

267

## 268 **Results**

### 269 **Calculation of value-based maximum price**

270 We calculated the country-wise value-based maximum price per course of the leishmaniasis vaccine  
271 and total demand based on equations 1,2 and 3, presented in tabular format (**Table 3**) and in the  
272 form of a demand curve for the illustrative set of 24 countries (**Figure 1**). As expected, the median  
273 value-based maximum price under the assumption of full coverage of CL and VL treatment is higher  
274 (by 19% on average) than under the assumption of no provision of treatment. This is because any  
275 treatment expenses saved through reduced incidence increase a country's ability to pay for the  
276 vaccine. The median value-based maximum price for the illustrative set of countries is \$4.4 and \$5.3  
277 under the assumption of 0% and 100% treatment coverage respectively.

278 <Figure 1: Illustrative global demand curve for a leishmaniasis vaccine (with 75% efficacy) between  
279 2030 and 2040>

280

### 281 **Sensitivity analysis**

#### 282 **Sensitivity to vaccine efficacy**

283 The estimated prices in the above scenario assume a vaccine efficacy of 75% in preventing CL / VL.  
284 Since vaccines against leishmaniasis are still under development or under testing, the actual efficacy  
285 is unknown. We therefore also consider the effect of a change in vaccine efficacy on value-based  
286 maximum prices (**Figure 2**). At an efficacy of 95%, the vaccine would prevent a larger number of  
287 cases of CL / VL, averting more DALYs, and allowing countries to be able to pay a higher price at the  
288 margin per course. This shifts the demand curve upwards from the earlier scenario assuming 75%  
289 efficacy. Similarly, a lower efficacy of 50% shifts the demand curve downwards. More specifically,  
290 the median value-based maximum price falls from \$4.4 to \$3.4 under the assumption of 0%  
291 treatment coverage and from \$5.3 to \$3.8 under the assumption of 100% treatment coverage when

292 the efficacy falls from 75% to 50%. At 95% efficacy, the median values rise to \$5.5 and \$6.5  
293 respectively (**Table 4**).

294 <Figure 2: Sensitivity of value-based maximum price to vaccine efficacy: (i) assuming treatment  
295 coverage = 0%, (ii) assuming treatment coverage = 100%>

296

### 297 **Impact of GAVI support for vaccine introduction**

298 The results described above treat countries as independent buyers of the vaccine whose ability to  
299 pay per vaccine course depends on their respective CET. However, international donors are often  
300 able to ensure the expansion of important health interventions to low and lower-middle income  
301 countries even when these may be locally cost-ineffective as a result of budget constraints. We  
302 consider the effect of future GAVI funding of a potential leishmaniasis vaccine for countries eligible  
303 for its support based on current criteria(16). We project that 11 of the 24 countries in our illustrative  
304 list will be in one of the GAVI support phases (**Supplementary table 3**), of which six countries have a  
305 CET lower than \$285 in 2030. Using a CET of \$285/DALY averted for these six countries, provides an  
306 alternate demand curve (**Figure 3**). The mean value-based price nearly doubles under both  
307 treatment coverage scenarios (**Table 4**).

308 <Figure 3: Illustrative global demand curve for a leishmaniasis vaccine (with 75% efficacy) between  
309 2030 and 2040 including GAVI support>

310

### 311 **Sensitivity to underreporting**

312 The final sensitivity analysis adjusting for underreporting increases the median ability to pay to \$14.9  
313 - \$18.2 under the assumption of underreporting by a factor of 3.2 and 3.5 for CL and VL,  
314 respectively. These figures increase to \$27.4 - \$33.4 when the upper bound underreporting factors  
315 of 5.7 and 6.7 are applied for CL and VL respectively (**Figure 4, Table 4**).

316 <Figure 4: Sensitivity of value-based maximum price to underreporting: (i) Low underreporting  
317 estimate , (ii) High underreporting estimate>

## 318 **Discussion**

319 This study has sought to provide a generalizable approach to estimating the commercial and public  
320 health value of new technologies in development relying primarily on publicly available GBD data.  
321 This simplified approach is easily replicable and can be used to guide discussions and investments  
322 into health technology development, particularly in low and middle-income countries (LMICs), which  
323 face significant constraints in acquiring and generating evidence compared with higher-income  
324 countries.

325

326 The utility of this approach is demonstrated by projecting the economic feasibility of a leishmaniasis  
327 vaccine based on currently available estimates of cost-effectiveness thresholds based on marginal  
328 productivity, disease incidence and burden of disease. While other studies have previously tried to  
329 estimate the cost-effectiveness of vaccines (35,36) and the monetary value of health  
330 technologies(24,25), our approach is novel for its global focus and simplicity as well as the  
331 incorporation of practical considerations including a realistic timescale of when the product is  
332 expected to be available for distribution, gradual rollout and an evolving expected marginal  
333 productivity of health systems.

334

335 Our results demonstrate that both the quantity of vaccines estimated to be required by the  
336 countries considered, which represent a majority of the global burden of disease from leishmaniasis,  
337 as well as their ability-to-pay make the vaccine commercially attractive to potential manufacturers.  
338 The global demand stands at over 560 million courses, and the value-based maximum price per  
339 course, given the current estimates of incidence and population at risk, is higher than \$5 for nearly  
340 half of the 24 countries considered. Assuming a full course of two doses and an expected  
341 manufacturing cost of \$2-3 per dose, based on adenovirus vaccines (37) similar to ChAd63-KH (the  
342 only leishmaniasis vaccine currently recruiting into clinical trial(12)), a leishmaniasis vaccine of this  
343 type would be commercially viable. The wide range of value-based maximum prices across different

344 countries also presents an opportunity for differential pricing to secure wide access. With possible  
345 future contributions from GAVI considering its current willingness to pay for the rotavirus  
346 vaccine(33), we estimate that the global demand curve would move further upwards. A similar  
347 upward effect in abilities to pay is observed with adjustment for underreporting.  
348  
349 It should be noted that the prices presented above represent the maximum full health system cost  
350 per vaccinated individual that countries can afford in the future. In other words, in order to  
351 determine the value-based maximum price for the vaccine itself, countries will also need to consider  
352 the number of doses required per course as well as the implementation costs. We have not included  
353 implementation costs in our calculations because of the vast uncertainty in these costs and  
354 variability across settings(38). These costs could make the vaccine unaffordable for some countries.  
355 Furthermore, the quality of the underlying data on disease demographics, burden of disease, vaccine  
356 rollout projections as well as the lack of treatment coverage data impose uncertainty around our  
357 results.  
358  
359 However, we believe that overall our projections underestimate the ability to pay for a leishmaniasis  
360 vaccine for a range of reasons including the exclusion of post-kala-azar dermal leishmaniasis (PKDL)  
361 and its effect on VL transmission(39), exclusion of disease dynamics or transmission effects,  
362 exclusion of psychosocial and mental health effects of the disease (which could amount to six times  
363 the current estimate of DALY burden for CL (40)), and exclusion of treatment cost for leishmaniasis-  
364 HIV coinfection (which would increase the treatment cost per VL case by up to four times (31)).  
365 Updating our assumptions based on a combination of all these factors could increase our estimates  
366 of maximum ability to pay. However, there are several other sources of uncertainty, imposed by a  
367 continuously evolving health sector landscape, which can only be addressed by updating these  
368 estimates as and when updated information becomes available. Therefore, our demand and price  
369 projections are far from definite but shine a light on important data gaps and uncertainties in



370 characterizing the leishmaniasis epidemic, addressing which will be crucial to better understanding  
371 the future value of a vaccine against these diseases.  
372  
373 With better data, a full epidemiological model capturing disease dynamics should form the basis of  
374 projections of the public health value of potential technologies. Such analysis is rarely feasible  
375 before a product enters a market due to lack of resources as well as global data on necessary  
376 parameters. Our framework overcomes these challenges, albeit through various simplifications, and  
377 we suggest that our results can be used to guide investments into improving the data available on  
378 leishmaniasis. In addition, our results should help set in motion global discussions on the public  
379 health value and commitment towards a leishmaniasis vaccine and help direct vaccine target  
380 product profiles to ensure economic feasibility.

381

## 382 **References**

- 383 1. Institute for Health Metrics and Evaluation. Global Burden of Disease Study 2019 (GBD 2019)  
384 Data Resources [Internet]. IHME. 2020 [cited 2021 Apr 1]. Available from:  
385 <http://ghdx.healthdata.org/gbd-2019>
- 386 2. Bern C, Maguire JH, Alvar J. Complexities of assessing the disease burden attributable to  
387 leishmaniasis [Internet]. Vol. 2, PLoS Neglected Tropical Diseases. PLoS Negl Trop Dis; 2008  
388 [cited 2021 Apr 7]. Available from: <https://pubmed.ncbi.nlm.nih.gov/18958165/>
- 389 3. Bailey F, Mondragon-Shem K, Hotez P, Ruiz-Postigo JA, Al-Salem W, Acosta-Serrano Á, et al. A  
390 new perspective on cutaneous leishmaniasis—Implications for global prevalence and burden  
391 of disease estimates. PLoS Negl Trop Dis. 2017;11(8):2–6.
- 392 4. Bailey F, Mondragon-Shem K, Haines LR, Olabi A, Alorfi A, Ruiz-Postigo JA, et al. Cutaneous  
393 leishmaniasis and co-morbid major depressive disorder: A systematic review with burden  
394 estimates. Boelaert M, editor. PLoS Negl Trop Dis [Internet]. 2019 Feb 25 [cited 2021 Apr  
395 9];13(2):e0007092. Available from: <https://dx.plos.org/10.1371/journal.pntd.0007092>

- 396 5. Singh VP, Ranjan A, Topno RK, Verma RB, Siddique NA, Ravidas VN, et al. Short report:  
397 Estimation of under-reporting of visceral leishmaniasis cases in Bihar, India. *Am J Trop Med*  
398 *Hyg* [Internet]. 2010 Jan [cited 2021 Mar 26];82(1):9–11. Available from:  
399 [/pmc/articles/PMC2803501/](https://pubmed.ncbi.nlm.nih.gov/2803501/)
- 400 6. den Boer M, Argaw D, Jannin J, Alvar J. Leishmaniasis impact and treatment access. Vol. 17,  
401 *Clinical Microbiology and Infection*. Blackwell Publishing Ltd; 2011. p. 1471–7.
- 402 7. Pascual Martínez F, Picado A, Roddy P, Palma P. Low castes have poor access to visceral  
403 leishmaniasis treatment in Bihar, India. *Trop Med Int Heal* [Internet]. 2012 May 1 [cited 2021  
404 Jul 1];17(5):666–73. Available from: [https://onlinelibrary.wiley.com/doi/full/10.1111/j.1365-](https://onlinelibrary.wiley.com/doi/full/10.1111/j.1365-3156.2012.02960.x)  
405 [3156.2012.02960.x](https://onlinelibrary.wiley.com/doi/full/10.1111/j.1365-3156.2012.02960.x)
- 406 8. Oryan A, Akbari M. Worldwide risk factors in leishmaniasis. Vol. 9, *Asian Pacific Journal of*  
407 *Tropical Medicine*. Elsevier (Singapore) Pte Ltd; 2016. p. 925–32.
- 408 9. Dantas-Torres F, Brandão-Filho SP. Visceral leishmaniasis in Brazil: Revisiting paradigms of  
409 epidemiology and control. Vol. 48, *Revista do Instituto de Medicina Tropical de Sao Paulo*.  
410 2006. p. 151–6.
- 411 10. Kamhawi S. The yin and yang of leishmaniasis control. Aksoy S, editor. *PLoS Negl Trop Dis*  
412 [Internet]. 2017 Apr 20 [cited 2021 Apr 12];11(4):e0005529. Available from:  
413 <https://dx.plos.org/10.1371/journal.pntd.0005529>
- 414 11. Gillespie PM, Beaumier CM, Strych U, Hayward T, Hotez PJ, Bottazzi ME. Status of vaccine  
415 research and development of vaccines for leishmaniasis. *Vaccine*. 2016 Jun 3;34(26):2992–5.
- 416 12. Kaye P. A Study to Assess the Safety, Efficacy and Immunogenicity of Leishmania Vaccine  
417 ChAd63-KH in PKDL [Internet]. *ClinicalTrials.gov* Identifier: NCT03969134. 2019 [cited 2021 Jul  
418 2]. Available from: <https://clinicaltrials.gov/ct2/show/NCT03969134>
- 419 13. Zhang WW, Karmakar S, Gannavaram S, Dey R, Lypaczewski P, Ismail N, et al. A second  
420 generation leishmanization vaccine with a markerless attenuated *Leishmania* major strain  
421 using CRISPR gene editing. *Nat Commun*. 2020;11(1):1–14.

- 422 14. Malvolti S, Malhame M, Mantel C, Rutte EA Le, Kaye PM. Human leishmaniasis vaccines: use  
423 cases, target population and potential global demand. *PLoS Negl Trop Dis*. 2021;Forthcoming.
- 424 15. The World Bank. New country classifications by income level: 2019-2020 [Internet]. World  
425 Bank Blogs. 2019 [cited 2021 Apr 12]. Available from:  
426 <https://blogs.worldbank.org/opendata/new-country-classifications-income-level-2019-2020>
- 427 16. GAVI. How to request new GAVI support. Geneva; 2019.
- 428 17. Pigott DM, Bhatt S, Golding N, Duda KA, Battle KE, Brady OJ, et al. Global distribution maps of  
429 the Leishmaniasis. *Elife*. 2014 Jun 27;2014(3).
- 430 18. Nations U, of Economic D, Affairs S, Division P. World Population Prospects 2019, Volume I:  
431 Comprehensive Tables.
- 432 19. Nations U, of Economic D, Affairs S, Division P. World Population Prospects 2019, Volume II:  
433 Demographic Profiles [Internet]. 2019 [cited 2021 Apr 1]. Available from:  
434 [www.unpopulation.org](http://www.unpopulation.org).
- 435 20. Abbafati C, Machado DB, Cislighi B, Salman OM, Karanikolos M, McKee M, et al. Global age-  
436 sex-specific fertility, mortality, healthy life expectancy (HALE), and population estimates in  
437 204 countries and territories, 1950–2019: a comprehensive demographic analysis for the  
438 Global Burden of Disease Study 2019. *Lancet* [Internet]. 2020 Oct 17 [cited 2021 Apr  
439 1];396(10258):1160–203. Available from: <http://www>.
- 440 21. Heydarpour F, Sari AA, Mohebal M, Shirzadi M, Bokaie S. Incidence and Disability-Adjusted  
441 Life Years (DALYs) Attributable to Leishmaniasis In Iran, 2013. *Ethiop J Health Sci* [Internet].  
442 2016 Jul 1 [cited 2021 Apr 7];26(4):381–8. Available from: [/pmc/articles/PMC4992778/](http://pmc/articles/PMC4992778/)
- 443 22. Cecílio P, Oliveira F, Silva AC da. Vaccines for Human Leishmaniasis: Where Do We Stand and  
444 What Is Still Missing? In: *Leishmaniasis as Re-emerging Diseases*. InTech; 2018. p. 59–79.
- 445 23. Mutiso JM, Macharia JC, Kiio MN, Ichagichu JM, Rikoi H, Gicheru MM. Development of  
446 Leishmania vaccines: predicting the future from past and present experience. *J Biomed Res*  
447 [Internet]. 2013 [cited 2021 Aug 13];27(2):85. Available from: [/pmc/articles/PMC3602867/](http://pmc/articles/PMC3602867/)

- 448 24. Phillips AN, Cambiano V, Nakagawa F, Ford D, Apollo T, Murungu J, et al. Point-of-Care Viral  
449 Load Testing for Sub-Saharan Africa: Informing a Target Product Profile. *Open Forum Infect*  
450 *Dis* [Internet]. 2016 May 1 [cited 2021 Aug 19];3(3). Available from:  
451 <https://academic.oup.com/ofid/article/3/3/ofw161/2593307>
- 452 25. Cambiano V, Ford D, Mabugu T, Napierala Mavedzenge S, Miners A, Mugurungi O, et al.  
453 Assessment of the Potential Impact and Cost-effectiveness of Self-Testing for HIV in Low-  
454 Income Countries. *J Infect Dis* [Internet]. 2015 Aug 15 [cited 2021 Aug 19];212(4):570–7.  
455 Available from: <https://academic.oup.com/jid/article/212/4/570/818811>
- 456 26. Ochalek J, Lomas J, Claxton K. Estimating health opportunity costs in low-income and middle-  
457 income countries: A novel approach and evidence from cross-country data. *BMJ Glob Heal*  
458 [Internet]. 2018 Jan 1 [cited 2020 Jul 16];3(6):964. Available from:  
459 <http://dx.doi.org/10.1136/bmjgh-2018-000964>
- 460 27. Lomas J, Claxton K, Ochalek J. Accounting for country- and time-specific values in the  
461 economic evaluation of health-related projects relevant to low- and middle-income  
462 countries. *Health Policy Plan*. 2021;Forthcoming.
- 463 28. Ochalek J, Lomas J, Claxton K. Estimating health opportunity costs in low-income and middle-  
464 income countries: a novel approach and evidence from cross-country data. *BMJ Glob Heal*  
465 [Internet]. 2018 [cited 2020 Jan 6];3:964. Available from: [http://dx.doi.org/10.1136/bmjgh-](http://dx.doi.org/10.1136/bmjgh-2018-000964)  
466 [2018-000964](http://dx.doi.org/10.1136/bmjgh-2018-000964)
- 467 29. Micah AE, Su Y, Bachmeier SD, Chapin A, Cogswell IE, Crosby SW, et al. Health sector  
468 spending and spending on HIV/AIDS, tuberculosis, and malaria, and development assistance  
469 for health: progress towards Sustainable Development Goal 3. *Lancet* [Internet]. 2020 Apr  
470 [cited 2020 Jul 23];0(0). Available from: <https://doi.org/10.1016/S0140-6736>
- 471 30. Ochalek J, Claxton K, Lomas J, Thompson KM. Valuing health outcomes: developing better  
472 defaults based on health opportunity costs. <https://doi.org/101080/1473716720201812387>  
473 [Internet]. 2020 [cited 2021 Aug 8]; Available from:

- 474 <https://www.tandfonline.com/doi/abs/10.1080/14737167.2020.1812387>
- 475 31. de Carvalho IPSF, Peixoto HM, Romero GAS, de Oliveira MRF. Cost of visceral leishmaniasis  
476 care in Brazil. *Trop Med Int Heal* [Internet]. 2017 Dec 1 [cited 2021 Apr 7];22(12):1579–89.  
477 Available from: <http://doi.wiley.com/10.1111/tmi.12994>
- 478 32. Eid Rodríguez D, San Sebastian M, Pulkki-Brännström A-M. “Cheaper and better”: Societal  
479 cost savings and budget impact of changing from systemic to intralesional pentavalent  
480 antimonials as the first-line treatment for cutaneous leishmaniasis in Bolivia. Al-Salem WS,  
481 editor. *PLoS Negl Trop Dis* [Internet]. 2019 Nov 6 [cited 2021 Apr 7];13(11):e0007788.  
482 Available from: <https://dx.plos.org/10.1371/journal.pntd.0007788>
- 483 33. Debellut F, Clark A, Pecenka C, Tate J, Baral R, Sanderson C, et al. Re-evaluating the potential  
484 impact and cost-effectiveness of rotavirus vaccination in 73 Gavi countries: a modelling study.  
485 *Lancet Glob Heal*. 2019 Dec 1;7(12):e1664–74.
- 486 34. Alvar J, Vélez ID, Bern C, Herrero M, Desjeux P, Cano J, et al. Leishmaniasis worldwide and  
487 global estimates of its incidence [Internet]. Vol. 7, *PLoS ONE*. Public Library of Science; 2012  
488 [cited 2021 Jul 1]. p. 35671. Available from: [www.plosone.org](http://www.plosone.org)
- 489 35. Ochalek J, Abbas K, Claxton K, Jit M, Lomas J. Assessing the value of human papillomavirus  
490 vaccination in Gavi-eligible low-income and middle-income countries. *BMJ Glob Heal*  
491 [Internet]. 2020 Oct 20 [cited 2021 Mar 26];5(10):3006. Available from:  
492 <http://dx.doi.org/10.1136/bmjgh-2020-003006>
- 493 36. Lee BY, Bacon KM, Shah M, Kitchen SB, Connor DL, Slayton RB. The economic value of a  
494 visceral leishmaniasis vaccine in Bihar State, India. *Am J Trop Med Hyg* [Internet]. 2012 Mar  
495 [cited 2021 Mar 26];86(3):417–25. Available from: [/pmc/articles/PMC3284356/](https://pubmed.ncbi.nlm.nih.gov/2284356/)
- 496 37. Biopharm. COVID-19 Adenovirus-Based Vaccine Supply – Production Titre & Dosage Quantity  
497 will be Critical to Achieve Global Access [Internet]. 2020 [cited 2021 Apr 8]. Available from:  
498 [https://www.biopharmservices.com/covid-19-adenovirus-based-vaccine-supply-production-](https://www.biopharmservices.com/covid-19-adenovirus-based-vaccine-supply-production-titre-dosage-quantity-will-be-critical-to-achieve-global-access/)  
499 [titre-dosage-quantity-will-be-critical-to-achieve-global-access/](https://www.biopharmservices.com/covid-19-adenovirus-based-vaccine-supply-production-titre-dosage-quantity-will-be-critical-to-achieve-global-access/)

- 500 38. Portnoy A, Vaughan K, Clarke-Deelder E, Suharlim C, Resch SC, Brenzel L, et al. Producing  
501 Standardized Country-Level Immunization Delivery Unit Cost Estimates. *Pharmacoeconomics*  
502 [Internet]. 2020 Sep 1 [cited 2021 Apr 12];38(9):995–1005. Available from:  
503 <https://doi.org/10.1007/s40273-020-00930-6>
- 504 39. Mukhopadhyay D, Dalton JE, Kaye PM, Chatterjee M. Post kala-azar dermal leishmaniasis: An  
505 unresolved mystery [Internet]. Vol. 30, *Trends in Parasitology*. Elsevier; 2014 [cited 2021 Apr  
506 9]. p. 65–74. Available from: [/pmc/articles/PMC3919212/](#)
- 507 40. Bailey F, Mondragon-Shem K, Haines LR, Olabi A, Alorfi A, Ruiz-Postigo JA, et al. Cutaneous  
508 leishmaniasis and co-morbid major depressive disorder: A systematic review with burden  
509 estimates. Boelaert M, editor. *PLoS Negl Trop Dis* [Internet]. 2019 Feb 25 [cited 2020 May  
510 8];13(2):e0007092. Available from: <http://dx.plos.org/10.1371/journal.pntd.0007092>  
511

| <b>Country</b> | <b>Continent</b> | <b>WHO<br/>Region</b> | <b>World Bank<br/>Income Level</b> | <b>Disease<br/>endemicity</b> | <b>GAVI support status<br/>(2020)</b> |
|----------------|------------------|-----------------------|------------------------------------|-------------------------------|---------------------------------------|
| Afghanistan    | Asia             | EMRO                  | Upper-middle                       | VL                            | Initial self-financing                |
| Algeria        | Africa           | EMRO                  | Upper-middle                       | VL                            | Ineligible                            |
| Bangladesh     | Asia             | SEARO                 | Low                                | CL & VL                       | Preparatory transition                |
| Brazil         | South America    | PAHO                  | Upper-middle                       | VL                            | Ineligible                            |
| China          | Asia             | WPRO                  | Lower-middle                       | CL & VL                       | Ineligible                            |
| Ethiopia       | Africa           | AFRO                  | High                               | CL                            | Initial self-financing                |
| Georgia        | Europe           | EURO                  | Lower-middle                       | VL                            | Fully self-financing                  |
| India          | Asia             | SEARO                 | Lower-middle                       | CL                            | Accelerated transition                |
| Israel         | Asia             | EURO                  | Lower-middle                       | VL                            | Ineligible                            |
| Kenya          | Africa           | AFRO                  | Lower-middle                       | CL                            | Preparatory transition                |
| Morocco        | Africa           | EMRO                  | Lower-middle                       | CL                            | Ineligible                            |
| Nepal          | Asia             | SEARO                 | Upper-middle                       | VL                            | Initial self-financing                |
| Nigeria        | Africa           | AFRO                  | High                               | CL                            | Accelerated transition                |

|              |               |      |              |         |                        |
|--------------|---------------|------|--------------|---------|------------------------|
| Pakistan     | Asia          | EMRO | Low          | VL      | Preparatory transition |
| Paraguay     | South America | PAHO | Low          | VL      | Ineligible             |
| Saudi Arabia | Asia          | EMRO | High         | VL      | Ineligible             |
| Somalia      | Africa        | EMRO | Low          | CL & VL | Initial self-financing |
| South Sudan  | Africa        | EMRO | Low          | CL      | Initial self-financing |
| Spain        | Europe        | EURO | Lower-middle | CL      | Ineligible             |
| Sudan        | Africa        | AFRO | Upper-middle | CL      | Preparatory transition |
| Syria        | Asia          | EMRO | Lower-middle | CL      | Initial self-financing |
| Tunisia      | Africa        | EMRO | Upper-middle | VL      | Ineligible             |
| Turkey       | Asia          | EURO | Upper-middle | VL      | Ineligible             |
| Uzbekistan   | Asia          | EURO | Low          | CL & VL | Accelerated transition |



| Country     | Visceral Leishmaniasis |                                                    |                                                     |                                                      |                                   |                                    |                                     | Cutaneous Leishmaniasis |                                                    |                                                     |                                                      |                                   |                                    |                                     |
|-------------|------------------------|----------------------------------------------------|-----------------------------------------------------|------------------------------------------------------|-----------------------------------|------------------------------------|-------------------------------------|-------------------------|----------------------------------------------------|-----------------------------------------------------|------------------------------------------------------|-----------------------------------|------------------------------------|-------------------------------------|
|             | Population at risk     | Incidence (%) among population at risk (0-4 years) | Incidence (%) among population at risk (5-14 years) | Incidence (%) among population at risk (15-19 years) | DALYs lost per person (0-4 years) | DALYs lost per person (5-14 years) | DALYs lost per person (15-19 years) | Population at risk      | Incidence (%) among population at risk (0-4 years) | Incidence (%) among population at risk (5-14 years) | Incidence (%) among population at risk (15-19 years) | DALYs lost per person (0-4 years) | DALYs lost per person (5-14 years) | DALYs lost per person (15-19 years) |
| Afghanistan | -                      |                                                    |                                                     |                                                      | 7.24                              | 5.25                               | 7.12                                | 11,124,437              | 0.944%                                             | 2.129%                                              | 1.374%                                               | 0.17                              | 0.42                               | 1.30                                |
| Algeria     | -                      |                                                    |                                                     |                                                      | 8.31                              | 5.08                               | 6.44                                | 10,609,819              | 0.187%                                             | 0.383%                                              | 0.275%                                               | 0.03                              | 0.03                               | 0.03                                |
| Bangladesh  | 30,955,876             | 0.003%                                             | 0.002%                                              | 0.001%                                               | 16.32                             | 10.40                              | 13.77                               | -                       |                                                    |                                                     |                                                      |                                   |                                    |                                     |
| Brazil      | 82,117,821             | 0.020%                                             | 0.015%                                              | 0.005%                                               | 14.40                             | 10.02                              | 14.86                               | -                       |                                                    |                                                     |                                                      | 0.04                              | 0.04                               | 0.04                                |
| China       | 232,875,380            | 0.001%                                             | 0.001%                                              | 0.000%                                               | 0.02                              | 0.02                               | 0.02                                | -                       |                                                    |                                                     |                                                      | 0.03                              | 0.04                               | 0.09                                |
| Ethiopia    | 3,424,788              | 0.123%                                             | 0.099%                                              | 0.035%                                               | 23.72                             | 17.04                              | 17.28                               | 5,455,824               | 0.002%                                             | 0.003%                                              | 0.002%                                               | 0.17                              | 0.52                               | 1.78                                |
| Georgia     | 2,580,002              | 0.009%                                             | 0.007%                                              | 0.002%                                               | 8.77                              | 3.68                               | 5.50                                | -                       |                                                    |                                                     |                                                      | 0.03                              | 0.03                               | 0.03                                |

| Country      | Visceral Leishmaniasis |                                                    |                                                     |                                                      |                                   |                                    |                                     | Cutaneous Leishmaniasis |                                                    |                                                     |                                                      |                                   |                                    |                                     |
|--------------|------------------------|----------------------------------------------------|-----------------------------------------------------|------------------------------------------------------|-----------------------------------|------------------------------------|-------------------------------------|-------------------------|----------------------------------------------------|-----------------------------------------------------|------------------------------------------------------|-----------------------------------|------------------------------------|-------------------------------------|
|              | Population at risk     | Incidence (%) among population at risk (0-4 years) | Incidence (%) among population at risk (5-14 years) | Incidence (%) among population at risk (15-19 years) | DALYs lost per person (0-4 years) | DALYs lost per person (5-14 years) | DALYs lost per person (15-19 years) | Population at risk      | Incidence (%) among population at risk (0-4 years) | Incidence (%) among population at risk (5-14 years) | Incidence (%) among population at risk (15-19 years) | DALYs lost per person (0-4 years) | DALYs lost per person (5-14 years) | DALYs lost per person (15-19 years) |
| India        | 134,094,347            | 0.017%                                             | 0.014%                                              | 0.004%                                               | 11.92                             | 6.93                               | 11.57                               | 107,275,478             | 0.000%                                             | 0.000%                                              | 0.000%                                               | 0.12                              | 0.45                               | 1.24                                |
| Israel       | -                      |                                                    |                                                     |                                                      | 7.06                              | 4.04                               | 5.80                                | 8,971,638               | 0.002%                                             | 0.004%                                              | 0.004%                                               | 0.03                              | 0.03                               | 0.03                                |
| Kenya        | 3,501,646              | 0.075%                                             | 0.053%                                              | 0.018%                                               | 10.48                             | 12.26                              | 16.09                               | -                       |                                                    |                                                     |                                                      | 0.11                              | 0.22                               | 0.46                                |
| Morocco      | -                      |                                                    |                                                     |                                                      | 6.44                              | 5.31                               | 6.72                                | 6,364,300               | 0.134%                                             | 0.251%                                              | 0.149%                                               | 0.11                              | 0.27                               | 0.59                                |
| Nepal        | 29,942,425             | 0.002%                                             | 0.002%                                              | 0.001%                                               | 11.30                             | 7.70                               | 11.76                               | -                       |                                                    |                                                     |                                                      |                                   |                                    |                                     |
| Nigeria      | -                      |                                                    |                                                     |                                                      | 26.32                             | 17.98                              | 13.73                               | 3,238,811               | 0.000%                                             | 0.000%                                              | 0.001%                                               | 0.20                              | 0.57                               | 1.41                                |
| Pakistan     | -                      |                                                    |                                                     |                                                      | 11.75                             | 9.17                               | 14.55                               | 91,841,655              | 0.011%                                             | 0.021%                                              | 0.017%                                               | 0.14                              | 0.40                               | 1.29                                |
| Paraguay     | 3,180,239              | 0.004%                                             | 0.003%                                              | 0.001%                                               | 15.33                             | 12.35                              | 16.40                               | -                       |                                                    |                                                     |                                                      | 0.08                              | 0.13                               | 0.17                                |
| Saudi Arabia | -                      |                                                    |                                                     |                                                      | 8.70                              | 4.34                               | 5.94                                | 3,794,820               | 0.028%                                             | 0.208%                                              | 0.343%                                               | 0.03                              | 0.03                               | 0.03                                |

| Country     | Visceral Leishmaniasis |                                                    |                                                     |                                                      |                                   |                                    |                                     | Cutaneous Leishmaniasis |                                                    |                                                     |                                                      |                                   |                                    |                                     |
|-------------|------------------------|----------------------------------------------------|-----------------------------------------------------|------------------------------------------------------|-----------------------------------|------------------------------------|-------------------------------------|-------------------------|----------------------------------------------------|-----------------------------------------------------|------------------------------------------------------|-----------------------------------|------------------------------------|-------------------------------------|
|             | Population at risk     | Incidence (%) among population at risk (0-4 years) | Incidence (%) among population at risk (5-14 years) | Incidence (%) among population at risk (15-19 years) | DALYs lost per person (0-4 years) | DALYs lost per person (5-14 years) | DALYs lost per person (15-19 years) | Population at risk      | Incidence (%) among population at risk (0-4 years) | Incidence (%) among population at risk (5-14 years) | Incidence (%) among population at risk (15-19 years) | DALYs lost per person (0-4 years) | DALYs lost per person (5-14 years) | DALYs lost per person (15-19 years) |
| Somalia     | 2,585,353              | 0.104%                                             | 0.080%                                              | 0.028%                                               | 17.72                             | 16.24                              | 15.52                               | -                       |                                                    |                                                     |                                                      |                                   |                                    |                                     |
| South Sudan | 2,088,706              | 0.432%                                             | 0.345%                                              | 0.103%                                               | 21.24                             | 14.36                              | 13.96                               | -                       |                                                    |                                                     |                                                      |                                   |                                    |                                     |
| Spain       | 37,193,165             | 0.001%                                             | 0.000%                                              | 0.000%                                               | 7.12                              | 4.27                               | 5.99                                | -                       |                                                    |                                                     |                                                      | 0.03                              | 0.03                               | 0.03                                |
| Sudan       | 9,336,300              | 0.084%                                             | 0.068%                                              | 0.025%                                               | 7.37                              | 4.40                               | 6.54                                | 40,171,954              | 0.004%                                             | 0.010%                                              | 0.008%                                               | 0.12                              | 0.26                               | 0.78                                |
| Syria       | -                      |                                                    |                                                     |                                                      | 8.16                              | 6.06                               | 6.76                                | 18,192,904              | 0.276%                                             | 0.911%                                              | 0.574%                                               | 0.08                              | 0.12                               | 0.16                                |
| Tunisia     | -                      |                                                    |                                                     |                                                      | 7.36                              | 4.41                               | 6.03                                | 6,220,910               | 0.184%                                             | 0.446%                                              | 0.283%                                               | 0.03                              | 0.03                               | 0.03                                |
| Turkey      | -                      |                                                    |                                                     |                                                      | 8.97                              | 4.96                               | 5.86                                | 43,467,592              | 0.015%                                             | 0.023%                                              | 0.013%                                               | 0.03                              | 0.03                               | 0.03                                |
| Uzbekistan  | -                      |                                                    |                                                     |                                                      | 8.29                              | 4.23                               | 5.33                                | 16,236,757              | 0.017%                                             | 0.021%                                              | 0.016%                                               | 0.03                              | 0.03                               | 0.03                                |

515

516

517 *Table 3: Value-based maximum price for a leishmaniasis vaccine course (2030-2040)*

| <b>Country</b> | <b>Total demand for vaccine courses (2030-2040)</b> | <b>Value-based maximum price per course (assuming treatment coverage = 0%)</b> | <b>Value-based maximum price per course (assuming treatment coverage = 100%)</b> |
|----------------|-----------------------------------------------------|--------------------------------------------------------------------------------|----------------------------------------------------------------------------------|
| Afghanistan    | 12,963,289.41                                       | 7.25                                                                           | 13.41                                                                            |
| Algeria        | 9,167,695.55                                        | 4.67                                                                           | 5.87                                                                             |
| Bangladesh     | 11,450,264.05                                       | 1.81                                                                           | 2.03                                                                             |
| Brazil         | 33,953,582.53                                       | 113.71                                                                         | 114.30                                                                           |
| China          | 76,399,800.95                                       | 0.02                                                                           | 0.05                                                                             |
| Ethiopia       | 9,532,973.75                                        | 24.16                                                                          | 25.36                                                                            |
| Georgia        | 936,403.91                                          | 4.00                                                                           | 4.27                                                                             |
| India          | 135,475,311.59                                      | 6.60                                                                           | 7.09                                                                             |
| Israel         | 8,893,083.19                                        | 0.46                                                                           | 0.48                                                                             |
| Kenya          | 3,369,092.01                                        | 41.74                                                                          | 43.89                                                                            |
| Morocco        | 4,878,091.63                                        | 8.33                                                                           | 9.08                                                                             |
| Nepal          | 11,517,484.52                                       | 1.45                                                                           | 1.64                                                                             |
| Nigeria        | 5,015,541.10                                        | 0.01                                                                           | 0.01                                                                             |

|               |                |              |              |
|---------------|----------------|--------------|--------------|
| Pakistan      | 101,103,820.38 | 0.18         | 0.25         |
| Paraguay      | 2,078,491.89   | 29.23        | 29.36        |
| Saudi Arabia  | 3,125,074.95   | 11.57        | 12.36        |
| Somalia       | 1,585,208.80   | 8.65         | 19.82        |
| South Sudan   | 1,049,268.43   | 115.09       | 159.44       |
| Spain         | 10,171,505.03  | 5.55         | 5.57         |
| Sudan         | 55,713,341.93  | 4.22         | 5.02         |
| Syria         | 21,633,241.88  | 1.31         | 3.93         |
| Tunisia       | 4,447,800.09   | 3.42         | 4.73         |
| Turkey        | 23,864,258.55  | 0.83         | 0.90         |
| Uzbekistan    | 15,730,232.81  | 0.09         | 0.16         |
| <b>Median</b> |                | <b>4.44</b>  | <b>5.29</b>  |
| <b>Mean</b>   |                | <b>16.43</b> | <b>19.54</b> |

518

519

Table 4: Value-based maximum price for a leishmaniasis vaccine course (2030-2040) – Sensitivity analyses

| Country     | With GAVI support                      |                                          |                                        | Efficacy = 50%                           |                                        | Efficacy = 95%                           |                                        | Underreporting by a factor of 3.2 (CL) and 3.5 (VL) |                                        | Underreporting by a factor of 5.7 (CL) and 6.7 (VL) |  |
|-------------|----------------------------------------|------------------------------------------|----------------------------------------|------------------------------------------|----------------------------------------|------------------------------------------|----------------------------------------|-----------------------------------------------------|----------------------------------------|-----------------------------------------------------|--|
|             | VBP (assuming treatment coverage = 0%) | VBP (assuming treatment coverage = 100%) | VBP (assuming treatment coverage = 0%) | VBP (assuming treatment coverage = 100%) | VBP (assuming treatment coverage = 0%) | VBP (assuming treatment coverage = 100%) | VBP (assuming treatment coverage = 0%) | VBP (assuming treatment coverage = 100%)            | VBP (assuming treatment coverage = 0%) | VBP (assuming treatment coverage = 100%)            |  |
| Afghanistan | 19.39                                  | 25.56                                    | 19.39                                  | 25.56                                    | 9.18                                   | 16.99                                    | 23.39                                  | 43.30                                               | 41.08                                  | 76.05                                               |  |
| Algeria     | 4.67                                   | 5.87                                     | 4.67                                   | 5.87                                     | 5.92                                   | 7.44                                     | 15.08                                  | 18.96                                               | 26.48                                  | 33.30                                               |  |
| Bangladesh  | 1.81                                   | 2.03                                     | 1.81                                   | 2.03                                     | 1.98                                   | 2.23                                     | 6.29                                   | 7.06                                                | 12.11                                  | 13.58                                               |  |
| Brazil      | 113.71                                 | 114.30                                   | 113.71                                 | 114.30                                   | 144.03                                 | 144.78                                   | 394.86                                 | 396.91                                              | 759.85                                 | 763.79                                              |  |
| China       | 0.02                                   | 0.05                                     | 0.02                                   | 0.05                                     | 0.02                                   | 0.07                                     | 0.06                                   | 0.19                                                | 0.12                                   | 0.37                                                |  |
| Ethiopia    | 24.16                                  | 25.36                                    | 24.16                                  | 25.36                                    | 30.60                                  | 32.12                                    | 83.89                                  | 88.06                                               | 161.40                                 | 169.42                                              |  |
| Georgia     | 4.00                                   | 4.27                                     | 4.00                                   | 4.27                                     | 5.07                                   | 5.41                                     | 13.89                                  | 14.82                                               | 26.73                                  | 28.52                                               |  |
| India       | 6.60                                   | 7.09                                     | 6.60                                   | 7.09                                     | 7.20                                   | 7.74                                     | 22.93                                  | 24.61                                               | 44.12                                  | 47.35                                               |  |
| Israel      | 0.46                                   | 0.48                                     | 0.46                                   | 0.48                                     | 0.59                                   | 0.60                                     | 1.50                                   | 1.54                                                | 2.63                                   | 2.71                                                |  |
| Kenya       | 41.74                                  | 43.89                                    | 41.74                                  | 43.89                                    | 52.88                                  | 55.60                                    | 144.96                                 | 152.42                                              | 278.95                                 | 293.31                                              |  |
| Morocco     | 8.33                                   | 9.08                                     | 8.33                                   | 9.08                                     | 10.55                                  | 11.50                                    | 26.90                                  | 29.30                                               | 47.23                                  | 51.46                                               |  |
| Nepal       | 1.45                                   | 1.64                                     | 1.45                                   | 1.64                                     | 1.59                                   | 1.80                                     | 5.05                                   | 5.69                                                | 9.71                                   | 10.95                                               |  |

|               |              |              |              |              |              |              |              |              |               |               |
|---------------|--------------|--------------|--------------|--------------|--------------|--------------|--------------|--------------|---------------|---------------|
| Nigeria       | 0.01         | 0.01         | 0.01         | 0.01         | 0.01         | 0.01         | 0.02         | 0.03         | 0.04          | 0.05          |
| Pakistan      | 0.21         | 0.27         | 0.21         | 0.27         | 0.23         | 0.32         | 0.59         | 0.81         | 1.04          | 1.43          |
| Paraguay      | 29.23        | 29.36        | 29.23        | 29.36        | 37.02        | 37.19        | 101.49       | 101.95       | 195.30        | 196.18        |
| Saudi Arabia  | 11.57        | 12.36        | 11.57        | 12.36        | 14.65        | 15.66        | 37.33        | 39.91        | 65.56         | 70.09         |
| Somalia       | 99.26        | 110.43       | 99.26        | 110.43       | 9.29         | 21.30        | 30.05        | 68.84        | 57.83         | 132.48        |
| South Sudan   | 398.55       | 442.90       | 398.55       | 442.90       | 123.92       | 171.79       | 399.66       | 553.68       | 769.07        | 1,065.46      |
| Spain         | 5.55         | 5.57         | 5.55         | 5.57         | 7.03         | 7.05         | 19.28        | 19.33        | 37.10         | 37.20         |
| Sudan         | 4.22         | 5.02         | 4.22         | 5.02         | 4.60         | 5.48         | 14.63        | 17.40        | 28.10         | 33.42         |
| Syria         | 1.63         | 4.24         | 1.63         | 4.24         | 1.66         | 4.97         | 4.23         | 12.68        | 7.43          | 22.26         |
| Tunisia       | 3.42         | 4.73         | 3.42         | 4.73         | 4.33         | 5.99         | 11.04        | 15.27        | 19.39         | 26.81         |
| Turkey        | 0.83         | 0.90         | 0.83         | 0.90         | 1.05         | 1.14         | 2.67         | 2.90         | 4.69          | 5.09          |
| Uzbekistan    | 0.09         | 0.16         | 0.09         | 0.16         | 0.11         | 0.20         | 0.28         | 0.51         | 0.50          | 0.90          |
| <b>Median</b> | <b>4.44</b>  | <b>5.29</b>  | <b>3.41</b>  | <b>3.81</b>  | <b>5.49</b>  | <b>6.52</b>  | <b>14.85</b> | <b>18.18</b> | <b>27.41</b>  | <b>33.36</b>  |
| <b>Mean</b>   | <b>32.54</b> | <b>35.65</b> | <b>12.31</b> | <b>14.94</b> | <b>19.73</b> | <b>23.22</b> | <b>56.67</b> | <b>67.34</b> | <b>108.19</b> | <b>128.42</b> |

522 Figure 1: Illustrative global demand curve for a leishmaniasis vaccine (with 75% efficacy) between 2030 and 2040

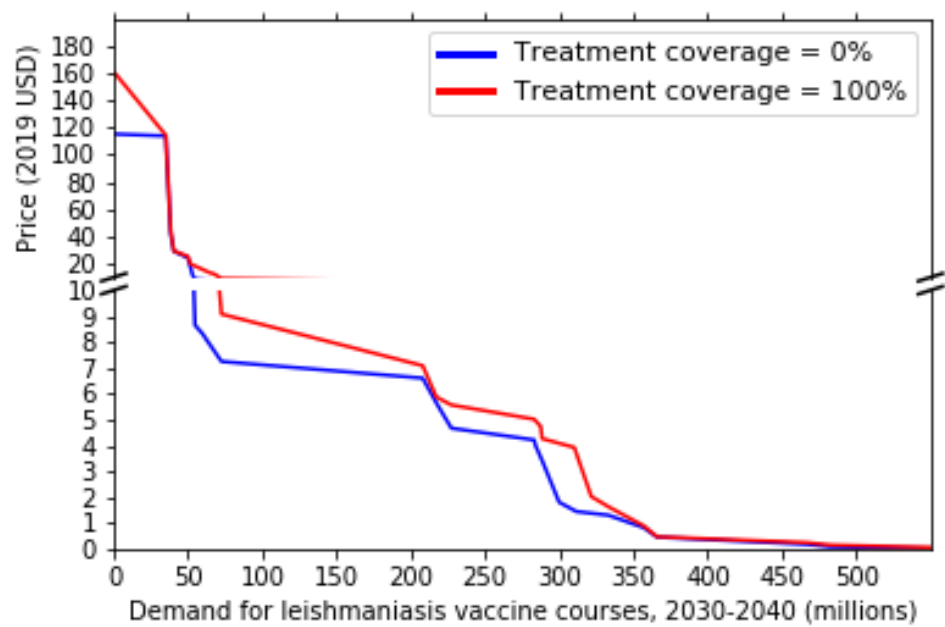

523

524



525 Figure 2: Sensitivity of value-based maximum price to vaccine efficacy: (i) assuming treatment coverage = 0%, (ii) assuming treatment coverage = 100%

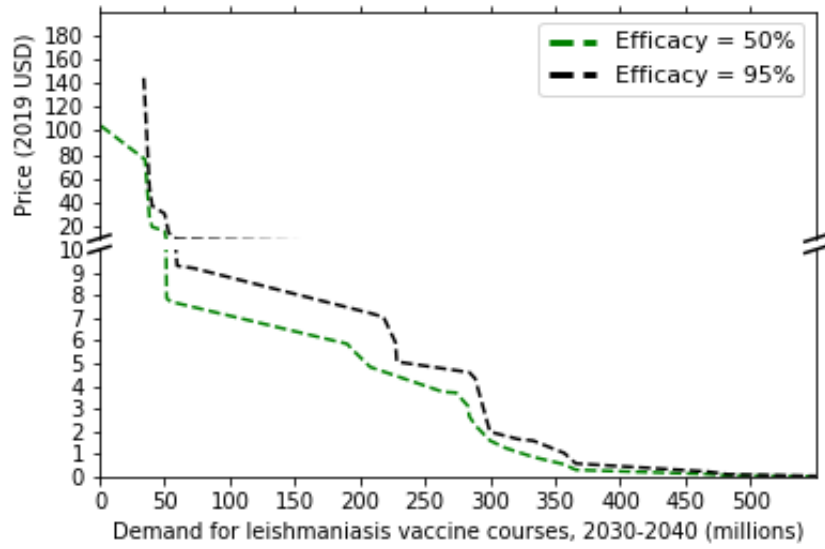

(i)

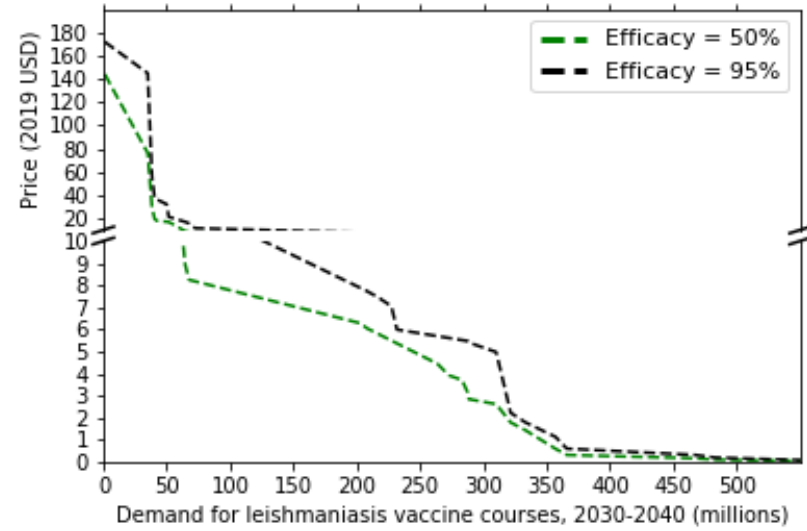

(ii)

526

527 Figure 3: Illustrative global demand curve for a leishmaniasis vaccine (with 75% efficacy) between 2030 and 2040 including GAVI support

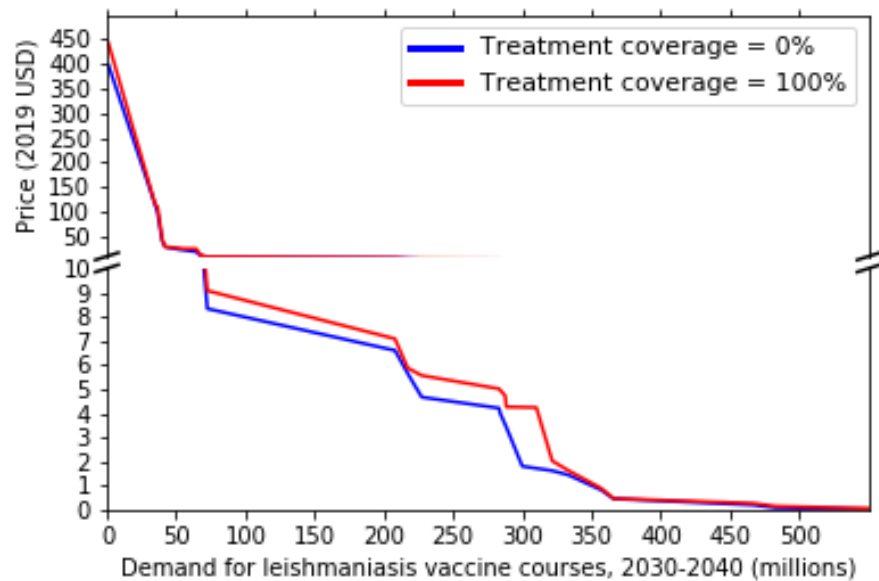

528

529

530 Figure 4: Sensitivity of value-based maximum price to underreporting: (i) Low underreporting estimate, (ii) High underreporting estimate

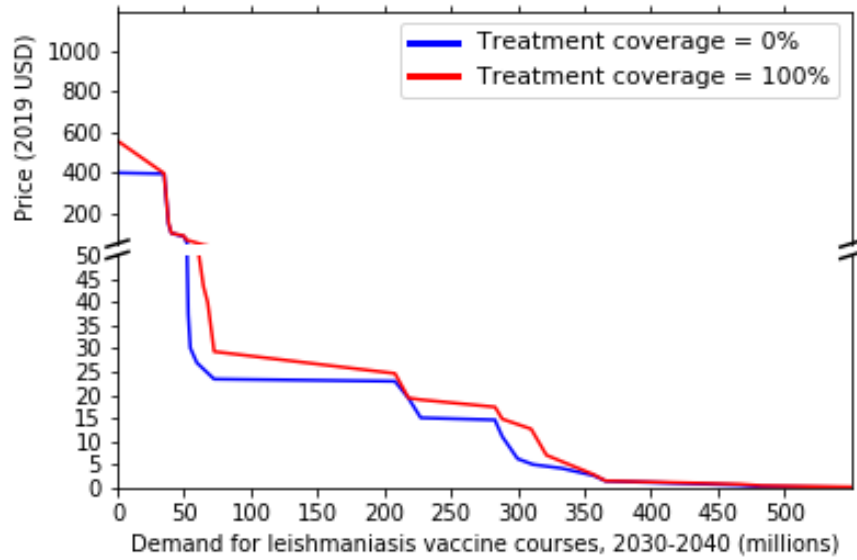

(i)

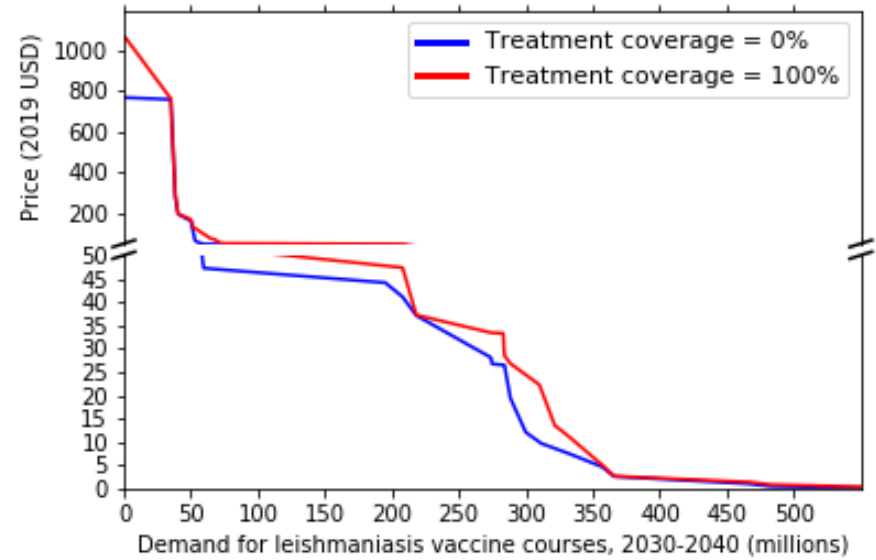

(ii)

531
